# Supplementary material for: Size dependent chemical ageing of oleic acid aerosol under dry and humidified conditions
Source: Copernicus journal article supplement (doi:10.5194/acp-2016-230), 2016-03-22
Supplement: Supplementary file 1 [file acp-2016-230-supplement.pdf]

## **SUPPORTING INFORMATION**

### **SIZE DEPENDENT CHEMICAL AGEING OF OLEIC ACID AEROSOL UNDER DRY AND HUMIDIFIED CONDITIONS**

**Suad Al-Kindi, Francis D. Pope, David C. Beddows, William J. Bloss and Roy M. Harrison**

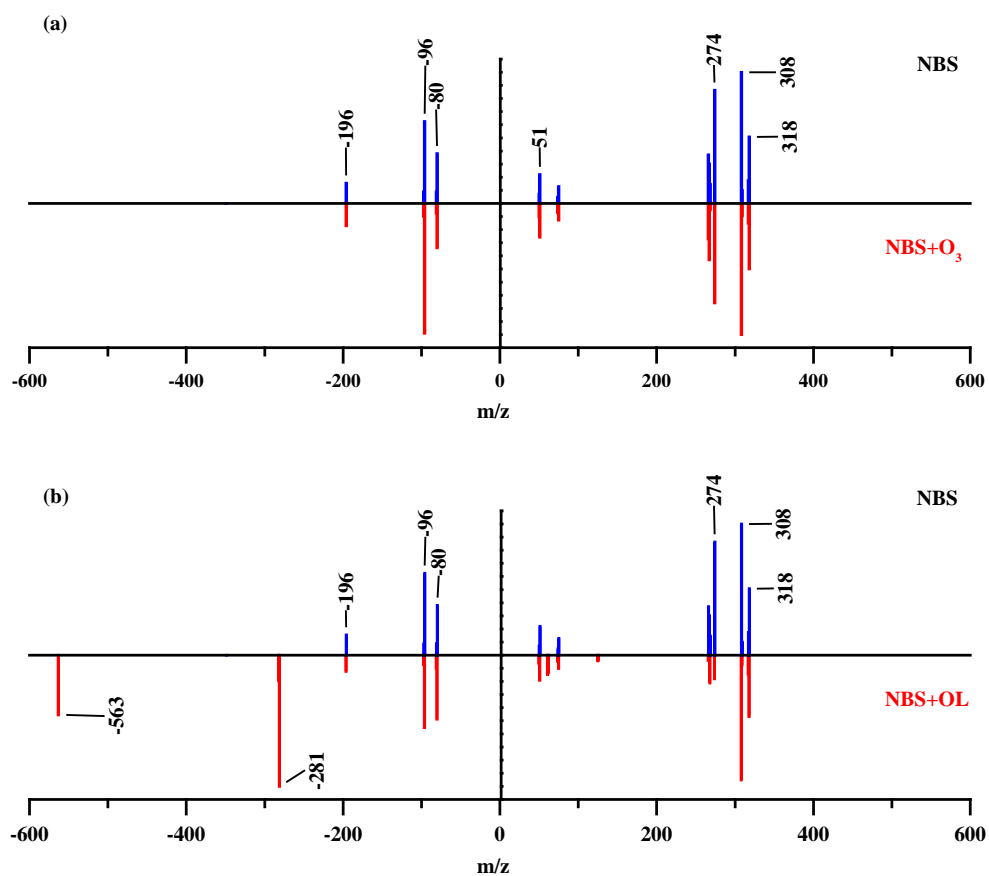

**Figure S1:** Positive and negative mass spectra of (a) NBS and NBS exposed to O<sub>3</sub> and (b) NBS and OL in NBS solution. Each spectrum presented represents the averages from 100 spectra
